# Supplementary material
Source: PubMed Central journal article supplement (PMC1331983)
Supplement: nar_34_2_397__1.pdf [file nar_34_2_397__1.pdf]

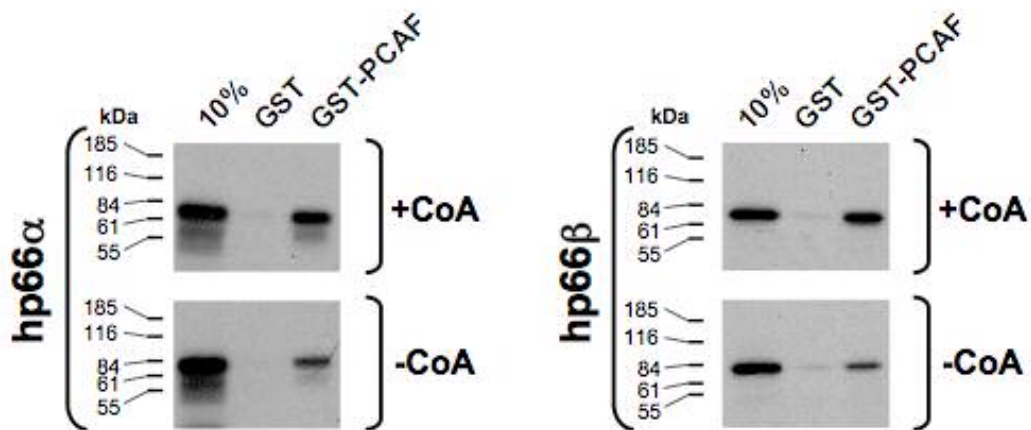

Supplement Figure: Auto-acetylated PCAF has no reduced binding affinity to p66 $\alpha$  or p66 $\beta$ . To test for a potential unspecific reduction of p66 binding affinity after acetylation of the bound protein, we used the auto-acetylated form of *E. coli* expressed PCAF (+CoA) and compared *in vitro* binding to p66 $\alpha$  and p66 $\beta$  relative to the non-acetylated form (-CoA). Interaction is not reduced, in contrast, it may even be increased upon acetylation.
